# Supplementary material for: Effectiveness of Localized Lockdowns in the COVID-19 Pandemic
Source: bioRxiv or medRxiv preprint supplement (doi:10.1101/2020.08.25.20182071), 2021-11-17
Supplement: Supplementary file [file 2020.08.25.20182071-1.pdf]

# Supplementary Material: Effectiveness of Localized Lockdowns in the SARS-CoV-2 Pandemic

Yige Li,<sup>1,2</sup> Eduardo A. Undurraga,<sup>3,4</sup> José R. Zubizarreta<sup>1,2,5,\*</sup>

<sup>1</sup>Department of Health Care Policy, Harvard Medical School, 180A Longwood Avenue,  
Boston, MA 02115, USA

<sup>2</sup>Department of Biostatistics, Harvard T. H. Chan School of Public Health, 677 Huntington Avenue,  
Boston, MA 02115, USA

<sup>3</sup>Escuela de Gobierno, Pontificia Universidad Católica de Chile, Vicuña Mackenna 4860, Macul,  
Santiago 7820436, Chile,

<sup>4</sup>Millennium Initiative for Collaborative Research in Bacterial Resistance (MICROB-R), Chile

<sup>5</sup>Department of Statistics, Harvard Faculty of Arts and Sciences, 1 Oxford Street  
Cambridge, MA 02138, USA

\*Correspondence and requests for materials should be addressed to:  
José R. Zubizarreta; [zubizarreta@hcp.med.harvard.edu](mailto:zubizarreta@hcp.med.harvard.edu).

# Contents

|          |                                                                                      |           |
|----------|--------------------------------------------------------------------------------------|-----------|
| <b>1</b> | <b>Materials and Methods</b>                                                         | <b>3</b>  |
| 1.1      | Notation: interventions and potential outcomes . . . . .                             | 3         |
| 1.2      | Estimands: direct, indirect, and total effects of lockdowns . . . . .                | 3         |
| 1.3      | Estimator: a synthetic control approach for duration and spillover effects . . . . . | 6         |
| 1.4      | Further details and code . . . . .                                                   | 7         |
| 1.5      | Baseline covariates and lagged variables . . . . .                                   | 8         |
| 1.6      | Integrated surveillance records, survey measurements, and census data . . . . .      | 9         |
| 1.7      | Outcome: the instantaneous reproduction number . . . . .                             | 9         |
| 1.8      | Data and code availability . . . . .                                                 | 10        |
| <b>2</b> | <b>Additional Information</b>                                                        | <b>12</b> |
| <b>3</b> | <b>Supplementary Figures</b>                                                         | <b>13</b> |
| 3.1      | Duration of the lockdowns and proportion of neighbours under lockdown . . . . .      | 13        |
| 3.2      | Covariate balance . . . . .                                                          | 14        |
| 3.3      | Results for other municipalities in Greater Santiago . . . . .                       | 15        |
| 3.4      | Results for other municipalities in the rest of Chile . . . . .                      | 17        |
| 3.5      | Estimated direct and total effects over time . . . . .                               | 19        |
| <b>4</b> | <b>Supplementary Tables</b>                                                          | <b>21</b> |
| 4.1      | An example . . . . .                                                                 | 21        |
| 4.2      | Baseline covariates . . . . .                                                        | 22        |
| 4.3      | Covariate balance . . . . .                                                          | 23        |
| 4.4      | Estimates . . . . .                                                                  | 27        |

# 1 Materials and Methods

## 1.1 Notation: interventions and potential outcomes

We base our analysis on the potential outcomes framework for causal inference (29, 24, 23) under interference (19, 20, 30). Let  $L_{ij_t}$  denote the lockdown indicator for municipality  $i = 1, \dots, I$  in cluster  $j_i = 1, \dots, J_i$  at time  $t = 1, \dots, T$ , with  $L_{ij_t} = 1$  if the municipality is under lockdown at time  $t$ , and  $L_{ij_t} = 0$  otherwise. In our analysis, since the cluster of municipality  $i$  is defined as the union of  $i$  and its adjacent municipalities, we can omit the index  $j_i$  for simplicity in the notation, but our approach is more general. Write  $\underline{L}_{it}$  for the lockdown history of municipality  $i$  until time  $t$ . Analogously, define  $P_{(i)t}$  as the proportion of the population in the cluster of municipality  $i$  under lockdown at time  $t$ , excluding municipality  $i$ , and  $\underline{P}_{(i)t}$  as the corresponding history until time  $t$ .<sup>1</sup> Following the frameworks for causal inference under interference by (19) and (20), we put  $R_{it}(\underline{L}_{it} = l_{it}, \underline{P}_{(i)t} = \underline{p}_{(i)t})$  for the potential effective reproduction number for municipality  $i$  in its cluster at time  $t$  under lockdown histories  $\underline{L}_{it}$  and  $\underline{p}_{(i)t}$  for the municipality and its neighbours until time  $t$ , respectively. Finally, designate  $I_{it}(\underline{L}_{it-1}(*), R_{it}(\underline{L}_{it} = l_{it}, \underline{P}_{(i)t} = \underline{p}_{(i)t}))$  as the potential incidence in municipality  $i$  at time  $t$ , which is a function of its potential incidence history  $\underline{L}_{it-1}(*)$  and potential effective reproduction number  $R_{it}(\underline{L}_{it} = l_{it}, \underline{P}_{(i)t} = \underline{p}_{(i)t})$ .

## 1.2 Estimands: direct, indirect, and total effects of lockdowns

For any given municipality  $i$ , we want to estimate the individual effect of lockdowns on the effective reproduction number  $R_{it}$  when intervening both on the duration of the lockdown  $\underline{L}_{it}$  and on the proportion of the population under lockdown in the neighbouring municipalities  $\underline{P}_{(i)t}$ . In particular, we are interested in the municipality-level direct, indirect, and total effects

---

<sup>1</sup>In this framework,  $l_{it}$  can also denote the proportion of the population under lockdown in municipality  $i$ , beyond whether or not the municipality is under lockdown.

of lockdowns across time (20).

Let  $l_{it}^a$  and  $l_{it}^b$  denote two alternative lockdown interventions on municipality  $i$  at time  $t$ , and  $p_{(i)t}^c$  and  $p_{(i)t}^d$  be two different interventions on the neighbouring municipalities also at time  $t$ . To fix ideas, in Supplementary Table 1 we provide a simple example. In the table,  $l_{it}^a$  denotes reopening the municipality in  $t = 22$  (week 4) after two weeks of lockdown ( $t = 8, \dots, 21$ ), whereas  $l_{it}^b$  denotes maintaining the municipality closed during  $t = 22, \dots, 28$  after the same lockdown history until  $t = 21$ . In the table,  $p_{(i)t}^c$  refers to reducing the population under lockdown in the neighbouring municipalities to 25% from  $t = 22$  after two weeks at 50%, whereas  $p_{(i)t}^d$  refers to maintaining the neighbouring population under lockdown at 50% after the same lockdown history.

Using this notation, for each municipality  $i$ , we are interested in the following causal contrasts on  $R_{it}$  and  $I_{it}$ :

- Direct effects

$$\text{DE}_{it}^R = R_{it}(\underline{L}_{it} = l_{it}^b, \underline{P}_{(i)t} = p_{(i)t}^c) - R_{it}(\underline{L}_{it} = l_{it}^a, \underline{P}_{(i)t} = p_{(i)t}^c),$$

$$\text{DE}_{it}^I = I_{it} \left( \underline{I}_{it-1}(*), R_{it}(\underline{L}_{it} = l_{it}^b, \underline{P}_{(i)t} = p_{(i)t}^c) \right) - I_{it} \left( \underline{I}_{it-1}(*), R_{it}(\underline{L}_{it} = l_{it}^a, \underline{P}_{(i)t} = p_{(i)t}^c) \right);$$

- Total effects

$$\text{TE}_{it}^R = R_{it}(\underline{L}_{it} = l_{it}^b, \underline{P}_{(i)t} = p_{(i)t}^d) - R_{it}(\underline{L}_{it} = l_{it}^a, \underline{P}_{(i)t} = p_{(i)t}^c),$$

$$\text{TE}_{it}^I = I_{it} \left( \underline{I}_{it-1}(*), R_{it}(\underline{L}_{it} = l_{it}^b, \underline{P}_{(i)t} = p_{(i)t}^d) \right) - I_{it} \left( \underline{I}_{it-1}(*), R_{it}(\underline{L}_{it} = l_{it}^a, \underline{P}_{(i)t} = p_{(i)t}^c) \right);$$

and

- Indirect effects

$$\begin{aligned} \text{IE}_{it}^R &= \text{TE}_{it}^R - \text{DE}_{it}^R \\ &= R_{it}(\underline{L}_{it} = l_{it}^b, \underline{P}_{(i)t} = p_{(i)t}^d) - R_{it}(\underline{L}_{it} = l_{it}^b, \underline{P}_{(i)t} = p_{(i)t}^c), \end{aligned}$$

$$\begin{aligned} \mathbf{IE}_{it}^I &= \mathbf{TE}_{it}^I - \mathbf{DE}_{it}^I \\ &= I_{it} \left( \underline{I}_{it-1}(*), R_{it}(\underline{L}_{it} = \underline{l}_{it}^b, \underline{P}_{(i)t} = \underline{p}_{(i)t}^d) \right) - I_{it} \left( \underline{I}_{it-1}(*), R_{it}(\underline{L}_{it} = \underline{l}_{it}^b, \underline{P}_{(i)t} = \underline{p}_{(i)t}^c) \right). \end{aligned}$$

For a group of municipalities  $\mathcal{I}$ , we are interested in the total effect

$$\mathbf{TE}_{\mathcal{I}t}^I = \sum_{i \in \mathcal{I}} \left[ I_{it} \left( \underline{I}_{it-1}(*), R_{it}(\underline{L}_{it} = \underline{l}_{it}^a, \underline{P}_{(i)t} = \underline{p}_{(i)t}^c) \right) - I_{it} \left( \underline{I}_{it-1}(*), R_{it}(\underline{L}_{it} = \underline{l}_{it}^b, \underline{P}_{(i)t} = \underline{p}_{(i)t}^d) \right) \right].$$

In both the direct and total effects, one of the two potential outcomes is observed and the other one needs to be estimated.

Our estimates will be valid causal estimates under the following assumptions. First, the potential effective reproduction number  $R_{it}(*)$  is subject to two types of interference, direct interference and allocational interference (30).<sup>2</sup> In regards to direct interference, the effective reproduction number can be approximated by the product of the time-varying transmission rate and a constant mean infectious period (31). The transmission rate can be considered as a function of population under lockdown and certain characteristics of the municipality. Therefore, the effects of the intervention of one municipality on the effective reproduction numbers of its neighbours are not mediated by the effective reproduction number in that municipality. In regards to allocational interference, we assume that the effective reproduction number of one municipality cannot be affected by interventions in non-adjacent neighbours. Second, we assume that the intervention assignment is ignorable given the observed baseline covariates (32, 23) and the factor loadings (25) of the potential outcomes. Third, the decrements in the proportion of the susceptible population are negligible during our studied period. Therefore, the estimation of  $R_t(*)$  does not differ by the calendar time.

---

<sup>2</sup>Under direct interference, one unit's exposure directly affects another unit's outcome, without being mediated by the first unit's outcome. Under allocational interference, one unit's outcome is affected by the units allocated to the same exposure group, either through the exposure or the outcomes of the other units in the same group (30).

### 1.3 Estimator: a synthetic control approach for duration and spillover effects

We use the augmented synthetic control method (25, 26) to estimate the potential effective reproduction number  $R_{it}(\ast)$  and calculate potential incidence  $I_{it}(\ast)$  from  $R_{it}(\ast)$ . See Equation (2) in (25) and the following subsection for details. The intuition behind this method is, for a given lockdown intervention in municipality  $i$ , to build a synthetic control municipality with very similar covariate, intervention and outcome histories until the time of the intervention by weighting appropriately in time control municipalities.

For each municipality  $i$  that is intervened at time  $t$ , we construct a set of candidate controls  $\mathcal{C}$  described in the next subsection. Let  $\tilde{t}$  denote the last day of lockdown. To estimate the potential  $R_{it}(\ast)$  during the extended lockdown,  $t = \tilde{t} + 1, \dots, \tilde{t} + \Delta_D$ , where  $\Delta_D$  represents the extension of the lockdown in days, we balance the baseline covariates, intervention and outcome histories with length  $h$  of the control set  $\mathcal{C}$  relative to those of municipality  $i$ . Starting from  $\tilde{t} + 1$ , we estimate the potential  $R_{i\tilde{t}+1}(\ast)$  by balancing  $R_{\mathcal{C}[1,h]} := (R_{\mathcal{C}1}, \dots, R_{\mathcal{C}h})$  relative to  $R_{i[\tilde{t}-h,\tilde{t}]} := (R_{i\tilde{t}-h}, \dots, R_{i\tilde{t}})$  and linearly weighting  $R_{\mathcal{C}h+1}$ . After adding the estimated potential  $R_{i\tilde{t}+1}(\ast)$  to and dropping  $R_{i\tilde{t}-h}$  from the history of potential  $R_{i\tilde{t}+2}(\ast)$ , we also move one day forward in the control set by balancing  $R_{\mathcal{C}[2,h+1]}$  to  $R_{i[\tilde{t}-h+1,\tilde{t}+1]}(\ast)$ . In this way, we estimate all the potential outcomes  $R_{i[\tilde{t}+1,\tilde{t}+\Delta_D]}(\ast) := (R_{i\tilde{t}+1}(\ast), R_{i\tilde{t}+2}(\ast), \dots, R_{i\tilde{t}+\Delta_D}(\ast))$ . Along with the lagged outcomes, the other lagged variables are adjusted similarly.

The balancing weights at time  $t$  can be found by first solving a convex optimization of the form

$$\min_{\eta_0, \eta_x, \eta_r, \eta_l, \eta_p} \frac{1}{2} \sum_{c \in \mathcal{C}} (R_{ct_h} - (\eta_0 + X_c \eta_{xt} + R_{c[t_h-h, t_h-1]} \eta_{rt} + L_{c[t_h-h, t_h-1]} \eta_{lt} + P_{(c)[t_h-h, t_h-1]} \eta_{pt}))^2 + \lambda_{xt} \|\eta_{xt}\|_2^2 + \lambda_{rt} \|\eta_{rt}\|_2^2 + \lambda_{lt} \|\eta_{lt}\|_2^2 + \lambda_{pt} \|\eta_{pt}\|_2^2,$$

where  $t_h = t - \tilde{t} - h$ ,  $\eta_0, \eta_x, \eta_r, \eta_l$  and  $\eta_p$  are the intercept and vectors of regression coefficients

associated with the pre-intervention baseline covariates  $X_c$ , time-varying reproduction numbers history  $R_{c[t_h-h, t_h-1]}$  and lockdown histories  $L_{c[t_h-h, t_h-1]}$  and  $P_{(c)[t_h-h, t_h-1]}$ , respectively; and  $\lambda_{xt}$ ,  $\lambda_{rt}$ ,  $\lambda_{lt}$ , and  $\lambda_{pt}$  are ridge regression tuning parameters that control the degree of regularization and that are selected by cross-validation.

Let  $\hat{\eta}_{xt}$ ,  $\hat{\eta}_{rt}$ ,  $\hat{\eta}_{lt}$  and  $\hat{\eta}_{pt}$  be the estimated regression coefficients under  $\lambda_{xt} = 0$ . Let  $\hat{\gamma}_{ct}$  be the implied synthetic control weights of unit  $c$  at time  $t$ . Let  $\hat{\gamma}_{ct}$  define the vector of control weights  $\hat{\gamma}_{ct}$ . Let  $R_{c[t_h-h, t_h-1]}$ ,  $L_{c[t_h-h, t_h-1]}$ , and  $P_{c[t_h-h, t_h-1]}$  denote, respectively, the matrices of  $R_{c[t_h-h, t_h-1]}$ ,  $L_{c[t_h-h, t_h-1]}$ , and  $P_{(c)[t_h-h, t_h-1]}$  with  $|C|$  rows and  $h$  columns.  $X_C$  represents the matrix of baseline covariates. The augmented synthetic control weights are given by

$$\begin{aligned} \hat{\gamma}_{ct}^{\text{cov}} &= \hat{\gamma}_{ct} + (\tilde{R}_{i[t-h, t-1]}(*) - \hat{\gamma}_{ct}^\top \tilde{R}_{c[t_h-h, t_h-1]})(\tilde{R}_{c[t_h-h, t_h-1]}^\top \tilde{R}_{c[t_h-h, t_h-1]} + \lambda_{rt} I_h)^{-1} \tilde{R}_{c[t_h-h, t_h-1]}^\top \\ &\quad + (X_i - \hat{\gamma}_{ct}^\top X_C)^\top (X_C^\top X_C)^{-1} X_C^\top \\ &\quad + (\tilde{l}_{i[t-h, t-1]} - \hat{\gamma}_{ct}^\top \tilde{L}_{c[t_h-h, t_h-1]})(\tilde{L}_{c[t_h-h, t_h-1]}^\top \tilde{L}_{c[t_h-h, t_h-1]} + \lambda_{lt} I_h)^{-1} \tilde{L}_{c[t_h-h, t_h-1]}^\top \\ &\quad + (\tilde{p}_{(i)[t-h, t-1]} - \hat{\gamma}_{ct}^\top \tilde{P}_{c[t_h-h, t_h-1]})(\tilde{P}_{c[t_h-h, t_h-1]}^\top \tilde{P}_{c[t_h-h, t_h-1]} + \lambda_{pt} I_h)^{-1} \tilde{P}_{(c)[t_h-h, t_h-1]}^\top, \end{aligned}$$

where  $\tilde{R}_{c[t_h-h, t_h-1]} = R_{c[t_h-h, t_h-1]} - X_c(X_C^\top X_C)^{-1} X_C^\top R_{c[t_h-h, t_h-1]}$ ,  $\tilde{R}_{i[t_h-h, t_h-1]}(*) = R_{i[t-h, t-1]}(*) - X_c(X_C^\top X_C)^{-1} X_C^\top R_{c[t_h-h, t_h-1]}$ ,  $\tilde{L}_{c[t_h-h, t_h-1]} = L_{c[t_h-h, t_h-1]} - X_c(X_C^\top X_C)^{-1} X_C^\top L_{c[t_h-h, t_h-1]}$ ,  $\tilde{P}_{(c)[t_h-h, t_h-1]} = P_{(c)[t_h-h, t_h-1]} - X_c(X_C^\top X_C)^{-1} X_C^\top P_{c[t_h-h, t_h-1]}$ .  $l_{i[t-h, t-1]}$  and  $p_{(i)[t-h, t-1]}$  are intervention histories,  $\tilde{l}_{i[t-h, t-1]}$ ,  $\tilde{p}_{(i)[t-h, t-1]}$  are projected into  $X_C$  similarly. The weights  $\hat{\gamma}_{ct}^{\text{cov}}$  exactly balance baseline covariates and approximately balance lagged interventions and outcomes. Point estimates are produced by linearly weighting the observed outcomes. See (25) for details.

## 1.4 Further details and code

In our estimations, we set  $h = 7$  because the partial autocorrelations of the estimated  $R_{it}$  for lags over 7 days is negligible. We also assume that  $R_{it}$  is not affected by the histories of lockdown

interventions and proportion of neighbouring population under lockdown beyond 7 days.

For each intervention municipality  $i$ , we built a set  $\mathcal{C}$  of candidate control municipalities as follows. We considered municipalities that had at least 10 reported cases and that were under lockdown for at least 14 days by June 15. For each of these candidate control municipalities  $k \neq i$ , we build a subset  $\mathcal{C}_k$  of municipality-periods of 14 days from the start of its lockdown intervention. Thus, a candidate control municipality  $k$  that was under lockdown for 14 days contributes 1 municipality-period to  $\mathcal{C}_k$ , a control municipality  $k'$  that was under lockdown for 15 days contributes 2 municipality-periods to  $\mathcal{C}_{k'}$ , and so on. In general, a candidate control municipality  $k$  that was under lockdown for  $D_k$  days contributes  $D_k - 14 + 1$  control municipality-periods to  $\mathcal{C}_k$ .  $\mathcal{C}$  is the union of all the sets  $\mathcal{C}_k$ .

After estimating all the potential  $R_{i[\tilde{t}+1, \tilde{t}+7]}(*)$  in the first week of extended lockdown, we recycle the control group for the prediction of the second week and the following weeks as well.

Assuming that the error terms of  $R_{ct}$  of all the units in the control set are independent across  $c$  and  $t$  and follow a sub-Gaussian distribution, the estimated conditional variance of each estimation from  $\tilde{t} + 1$  to  $\tilde{t} + \Delta_D$  given its history is obtained using the R package of (25). The variance of estimation at each time is calculated by the law of total variance.

To estimate the variance of the average  $R_{it}(*)$  from  $\tilde{t} + 1$  to  $\tilde{t} + \Delta_D$ , we first estimate the autocorrelation of the observed series in  $i$  and then estimate the variance of the sum of those correlated random variables.

We conducted all our analyses using R. The code can be found through this link: [https://scholar.harvard.edu/files/zubizarreta/files/code\\_v1.0.zip](https://scholar.harvard.edu/files/zubizarreta/files/code_v1.0.zip).

## 1.5 Baseline covariates and lagged variables

Following (31), the effective reproduction number is proportional to the time-varying transmission rate, which is a function of certain characteristics of the municipalities. We consider



both baseline (time-invariant) covariates and lagged (time-varying) variables. Both of these variables may confound the effect of the lockdown interventions, so we adjust for them. A summary of the baseline, time-invariant covariates is in Supplementary Table 2. The lagged variables include:  $h$ -day history of effective reproduction number,  $h$ -day history of proportion of neighbouring population under lockdown, and  $h$ -day history of lockdown interventions.

## **1.6 Integrated surveillance records, survey measurements, and census data**

Our data sets combine information from administrative COVID-19 surveillance records, a nationally representative household survey, and census data. Specifically, we use epidemiologic surveillance records from the Department of Epidemiology of Chilean Ministry of Health (22). We utilize municipality measurements from Chile’s National Socioeconomic Characterization Survey (CASEN), a nationally representative household survey of the Chilean Ministry of Social Development that collects data on education, employment, income, health, and housing (27). Finally, we employ population data from the 2017 National Census (28). All data used in this article is publicly available. We adjust the incidence series in order to correct for the lag in reporting and some incomplete municipality level data. First, we impute the incomplete data by interpolating between the closest dates with complete data. Second, we estimate the lag in reporting using the PELT algorithm (33) and adjust the incidence series employing the implementation by (34). These adjustments took into consideration that the lag between symptom onset date and report date can vary across municipalities and over time. With the adjusted series, we estimate the effective reproduction number following (21).

## **1.7 Outcome: the instantaneous reproduction number**

For ease of exposition, in this subsection we drop the index  $i$  and write the instantaneous reproduction number as  $R_t$ . This provides a real-time estimate of the effective reproduction number.

Following (21),  $R_t$  can be estimated by

$$R_t = \frac{I_t}{\sum_{s=1}^t I_{t-s} w_s},$$

where  $I_t$  is the incidence at time  $t$  and  $w_s$  is the infectivity function or density of the serial interval at time  $s$ . (21) propose estimating  $R_t$  over a window of time  $\tau$  as

$$R_t = \frac{\sum_{s=t-\tau+1}^t I_s}{\sum_{s=t-\tau+1}^t \sum_{r=1}^s I_{s-r} w_r}.$$

See (35) for a discussion of the method by (21) and other related approaches to estimating the effective reproduction number.

According to (36) and (10), during the SARS-CoV-2 outbreak in Wuhan, the distribution of the serial interval had a mean of 7.5 days, a standard deviation of 3.4 days, and a 95% confidence interval of [5.3, 19] days. In conformity with (21, 10) , we thus assume that the serial interval has a Gamma distribution with a mean of 7.5 days and a standard deviation of 3.4 days and  $\tau = 5$ . Following (21), we compute  $E[I_t(*)]$  from the estimated  $R_t(*)$  by  $E[I_t(*)|R_t(*), \{I_{t-s}(\cdot)\}_{s=1}^t] = R_t(*) \sum_{s=1}^t I_{t-s}(\cdot) w_s$ . Therefore,  $\text{Var}(E[I_t(*)]) = (\sum_{s=1}^t E[I_{t-s}(\cdot)] w_s)^2 \text{Var}(E[R_t(*)])$ .

## 1.8 Data and code availability

The datasets used and/or analyzed during the current study are available from Base de Datos CoVID-19 repository at <http://www.minciencia.gob.cl/covid19>. The R code used for analysis is available at <http://jrzubizarreta.com/>.

## References

29. Neyman, J. Sur les applications de la thar des probabilities aux experiences Agaricales: Essay des principe. Excerpts reprinted (1990) in English. *Stat. Sci.* **5**, 463-472 (1923).
30. Ogburn, E. L. & VanderWeele, T. J. Causal diagrams for interference. *Stat. Sci.* **29**, 559-578 (2014).
31. Hooker, G., Ellner, S. P., Roditi, L. D. V. & Earn, D. J. Parameterizing state–space models for infectious disease dynamics by generalized profiling: measles in Ontario. *J. R. Soc. Interface* **8**, 961-974 (2011).
32. Rosenbaum, P. R., Rubin & D. B. The central role of the propensity score in observational studies for causal effects. *Biometrika* **70**, 41-55 (1983).
33. Killick, R., Fearnhead, P. & Eckley, I. A. Optimal detection of changepoints with a linear computational cost. *J. Am. Stat. Assoc.* **107**, 1590-1598 (2012).
34. Zhao, Q., Ju, N. & Bacallado, S. Commentary: Using Symptom Onset Instead of Incidence Results in Time-Lagged Estimate of  $R(t)$ . *JAMA* **323**, 1924 (2020).
35. Gostic, K. M. *et al.* Practical considerations for measuring the effective reproductive number,  $R_t$ . *medRxiv*, 2020.2006.2018.20134858 (2020).
36. Li, Q. *et al.* Early transmission dynamics in Wuhan, China, of novel coronavirus–infected pneumonia. *N. Engl. J. Med.* **382**, 1199-1207 (2020).

## **2 Additional Information**

### **Acknowledgments**

The authors thank Eric Cohn (Harvard School of Public Health), Eduardo Engel (Universidad de Chile), Catterina Ferreccio (Pontificia Universidad Católica de Chile), César Hidalgo (University of Toulouse), Ronald Kessler (Harvard Medical School), Guillermo Marshall (Pontificia Universidad Católica de Chile), Gonzalo Mena (University of Oxford), Bijan Niknam (Harvard University), and Paul Rosenbaum (University of Pennsylvania) for comments and conversations. This work was partially supported by a grant from the Alfred P. Sloan Foundation (G-2018-10118), an award from the Patient-Centered Outcomes Research Institute (PCORI; ME-2019C1-16172), and the ANID Millennium Science Initiative/ Millennium Initiative for Collaborative Research on Bacterial Resistance, MICROB-R, [NCN17\_081]. The datasets used in the current study are available from Base de Datos CoVID-19 repository at <http://www.minciencia.gob.cl/covid19>.

### **Author contributions**

YL, EU, JZ: conceptualization, data curation, resources, results interpretation, writing and revising the manuscript. YL: data analysis. YL, JZ: modeling methods.

### **Competing interests statement**

Authors declare no competing interests.

### 3 Supplementary Figures

#### 3.1 Duration of the lockdowns and proportion of neighbours under lockdown

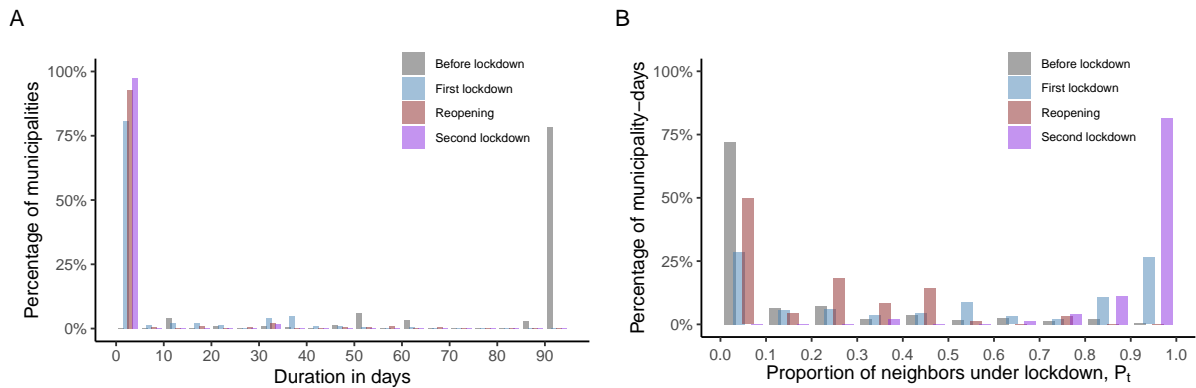

**Supplementary Figure 1: Background. A:** Histogram of the durations of different lockdown statuses in all municipalities (before lockdown, during the first lockdown, after the reopening, during the second lockdown) in days. From March 15 to June 15, all of the lockdown interventions occur within 21.7% of the municipalities. The median duration of the first lockdown is 32 days. **B:** Histogram of the proportion of neighbours under lockdown,  $P_t$ , in municipality-days from March 15 to June 15. During the second lockdown period, 81.5% of the municipality-days showed more than 90.0% of its neighbouring population under lockdown.

## 3.2 Covariate balance

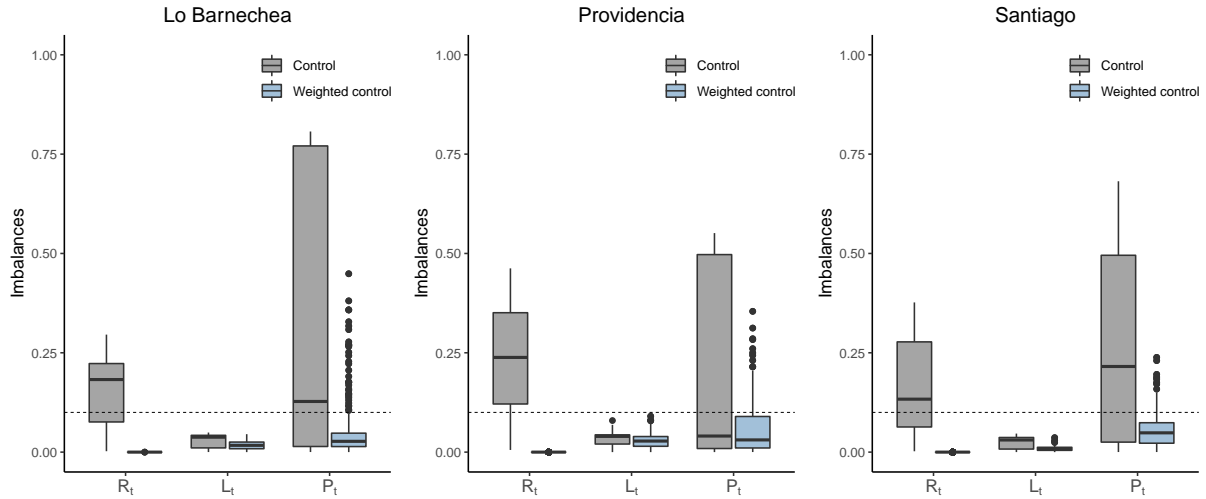

**Supplementary Figure 2: Covariate balance in Lo Barnechea, Providencia, and Santiago.** Imbalance of all the lagged variables, including the instantaneous reproduction number  $R_t$ , the lockdown indicator  $L_t$ , and the proportion of neighbouring population under lockdown  $P_t$ , in the control units before and after weighting. The dashed line at 0.1 denotes the commonly accepted balance threshold. After weighting, the imbalances of  $R_t$  is near 0, the imbalance of  $L_t$  is reduced substantially, and the third quartile of the imbalance of  $P_t$  is below 0.1.

### 3.3 Results for other municipalities in Greater Santiago

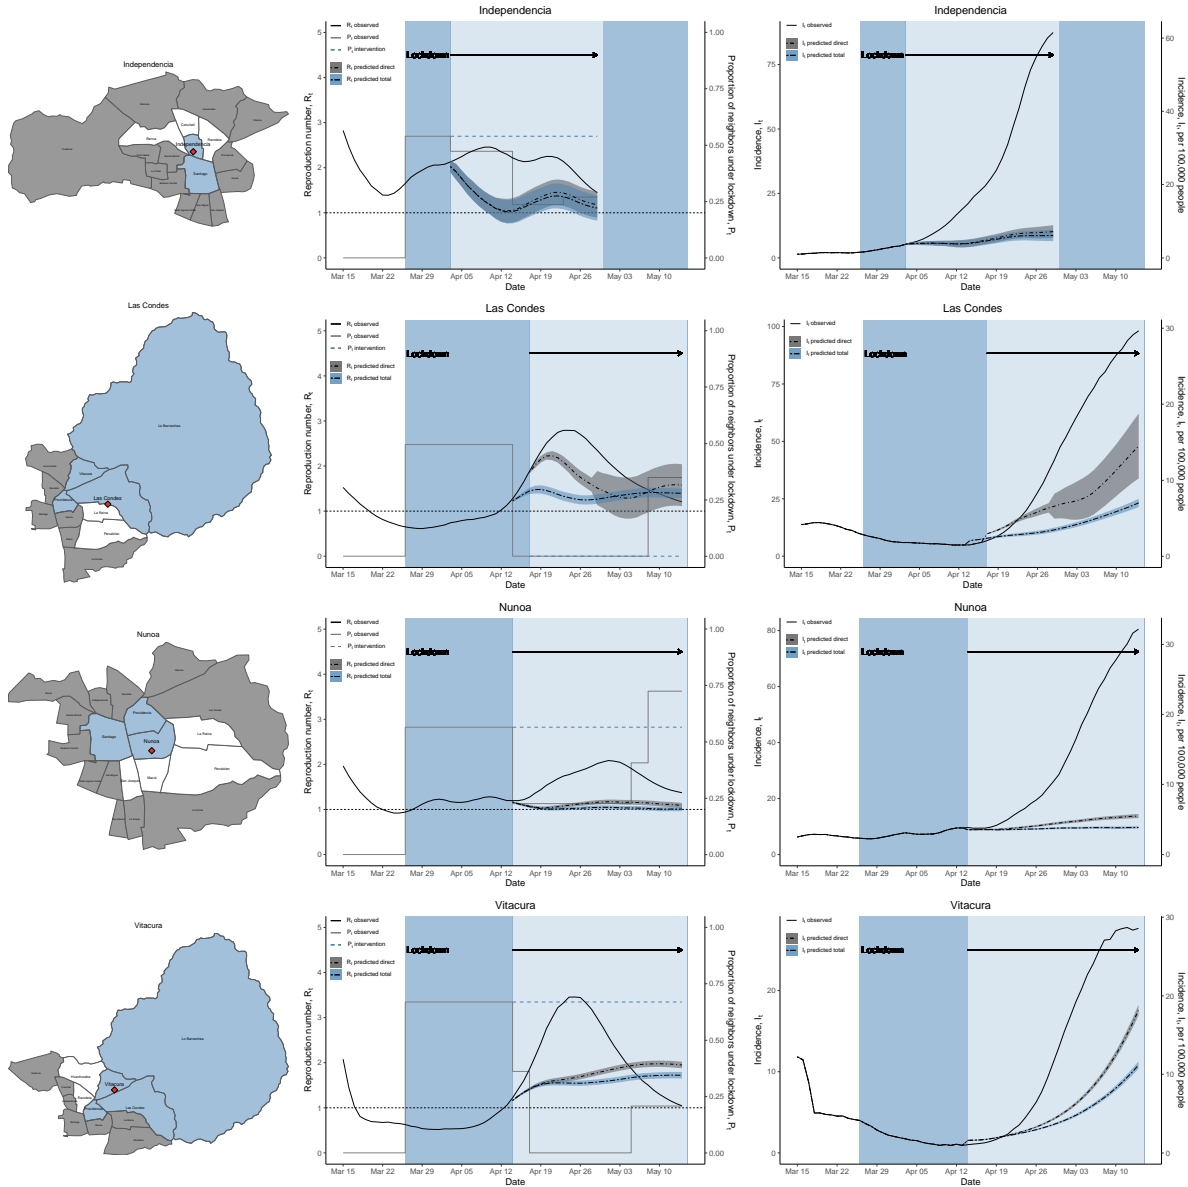

**Supplementary Figure 3: Results for extended lockdown in Independencia, Las Condes, Ñuñoa, and Vitacura.** The neighbours of Las Condes reopened simultaneously three days before its own reopening. To study the total effect, we intervene on its neighbours Providencia, Vitacura, and Lo Barnechea to maintain their lockdown status rather than reopen.

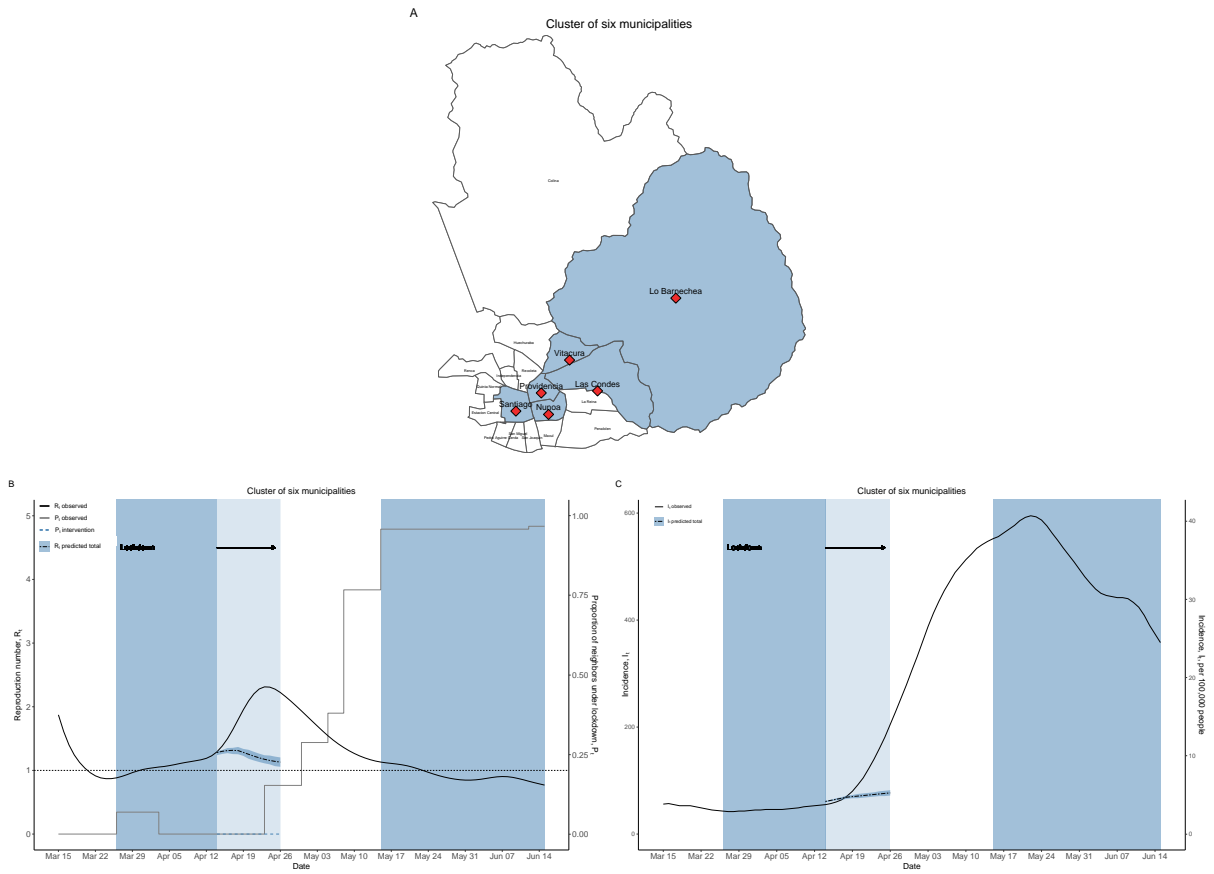

**Supplementary Figure 4: Results for extended lockdown in a group of municipalities in Greater Santiago.** **A.** No neighbours of the cluster of six municipalities are under lockdown on April 13. **B.** The estimates of the potential  $R_t$  if the lockdown is extended from March 26 to April 26, when their neighbours remain open. **C.** Changes in the incidence. The second lockdown period from May 15 to June 15 is included as a comparison to the first lockdown period from March 26 to April 26.



### 3.4 Results for other municipalities in the rest of Chile

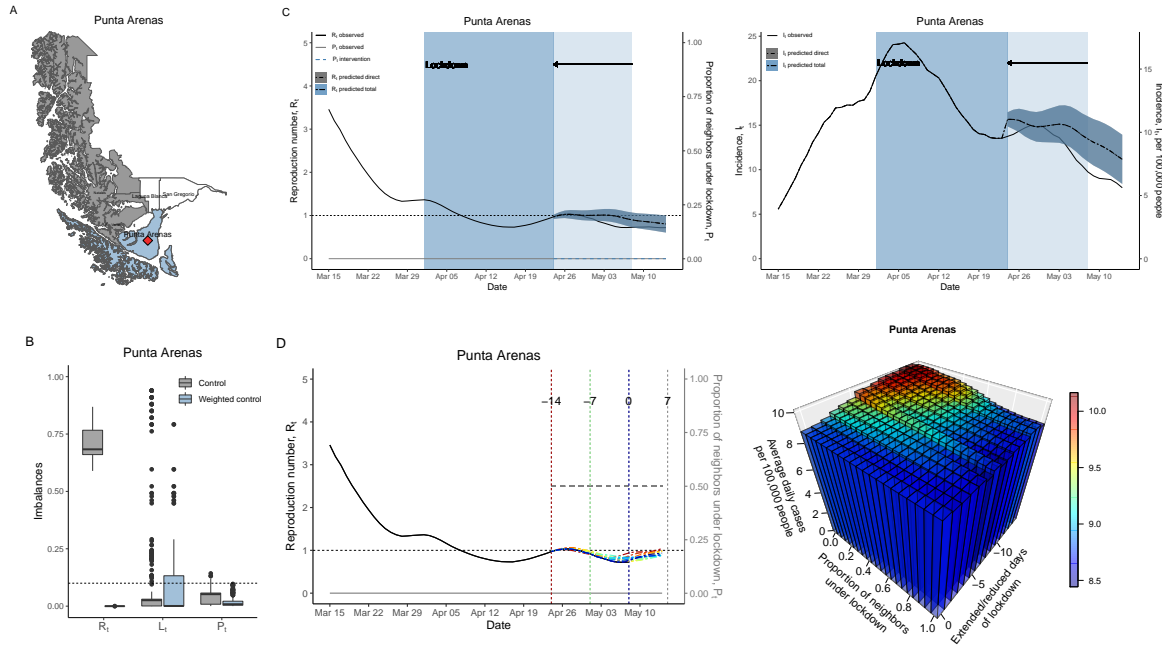

**Supplementary Figure 5: Results for Punta Arenas.** **A.** Punta Arenas is a relatively isolated municipality. **B.** Imbalances in the lagged variables before and after weighting.<sup>3</sup>**C.** The initial weeks of lockdown in Punta Arenas were effective in terms of reducing the effective reproduction number and the incidence. After reopening, the reproduction number stabilized at a low level. **D.** The impact of neighbouring lockdowns on Punta Arenas is relatively small.

<sup>3</sup>To estimate the impact of reducing lockdown duration, the control set is composed of candidate municipalities which were under lockdown for at least 7 days and had reopened for at least 14 days.

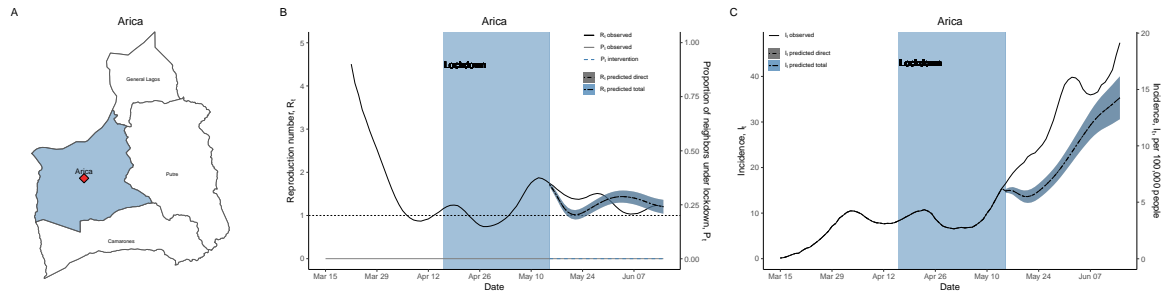

**Supplementary Figure 6: Results for Arica as a comparison to Punta Arenas. A.** Arica is another relatively isolated municipality. **B.** During lockdown, the average reproduction number is above one. After reopening, both the actual reproduction numbers and the predicted ones are also above one. **C.** Both the predicted and actual series exhibit a steady increase in the incidence.

### 3.5 Estimated direct and total effects over time

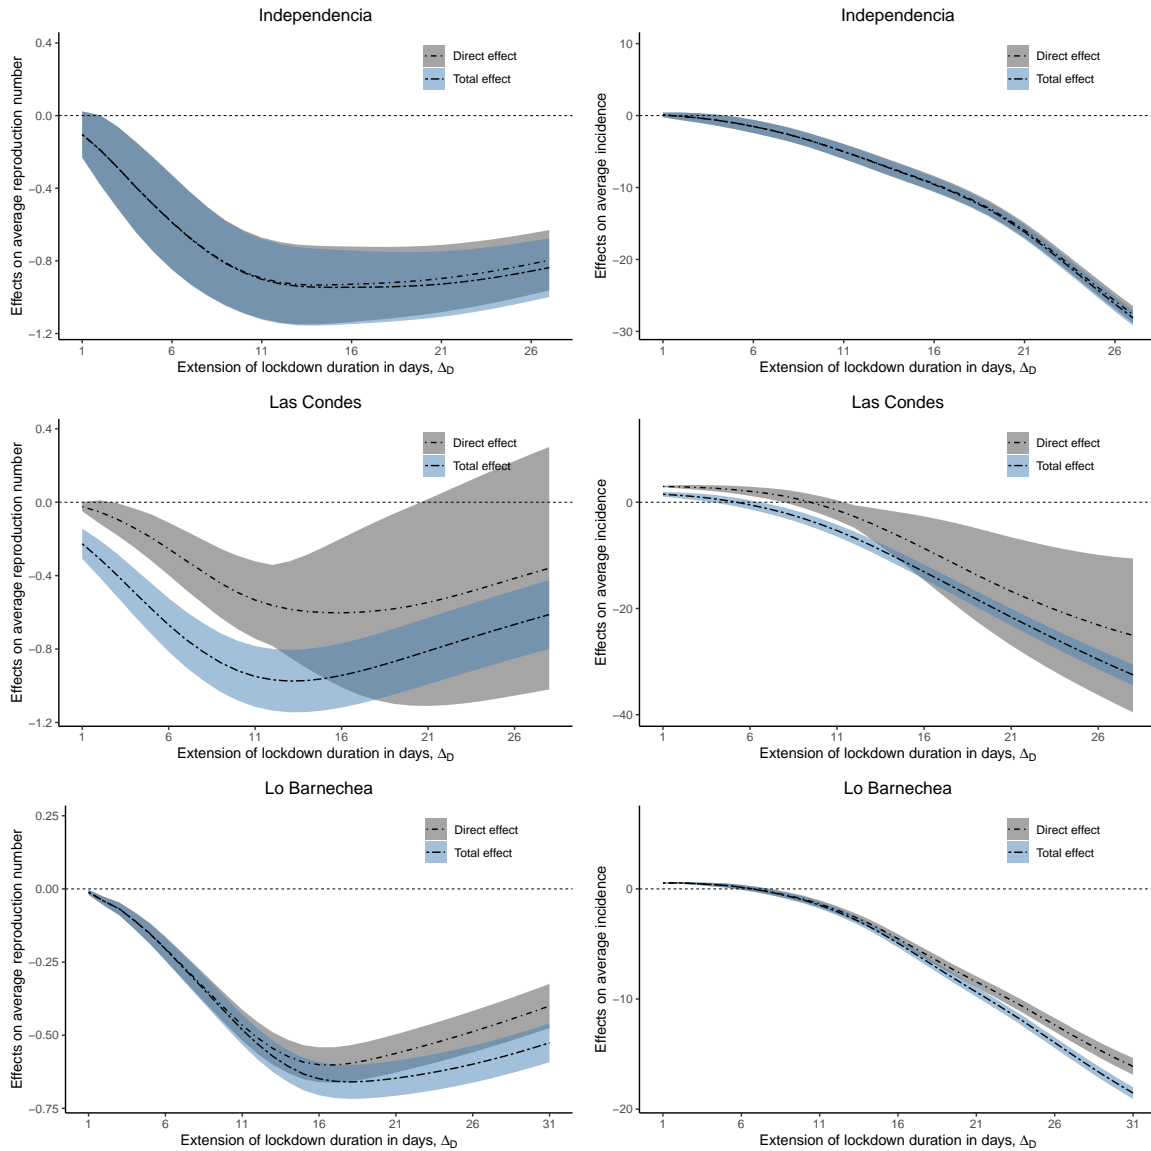

**Supplementary Figure 7:** Direct and total effect of extended lockdowns on average reproduction number  $\text{avg}(R_{[\tilde{t}+1, \tilde{t}+\Delta_D]})$  and average incidence  $\text{avg}(I_{[\tilde{t}+1, \tilde{t}+\Delta_D]})$  in Independencia, Las Condes, and Lo Barnechea.

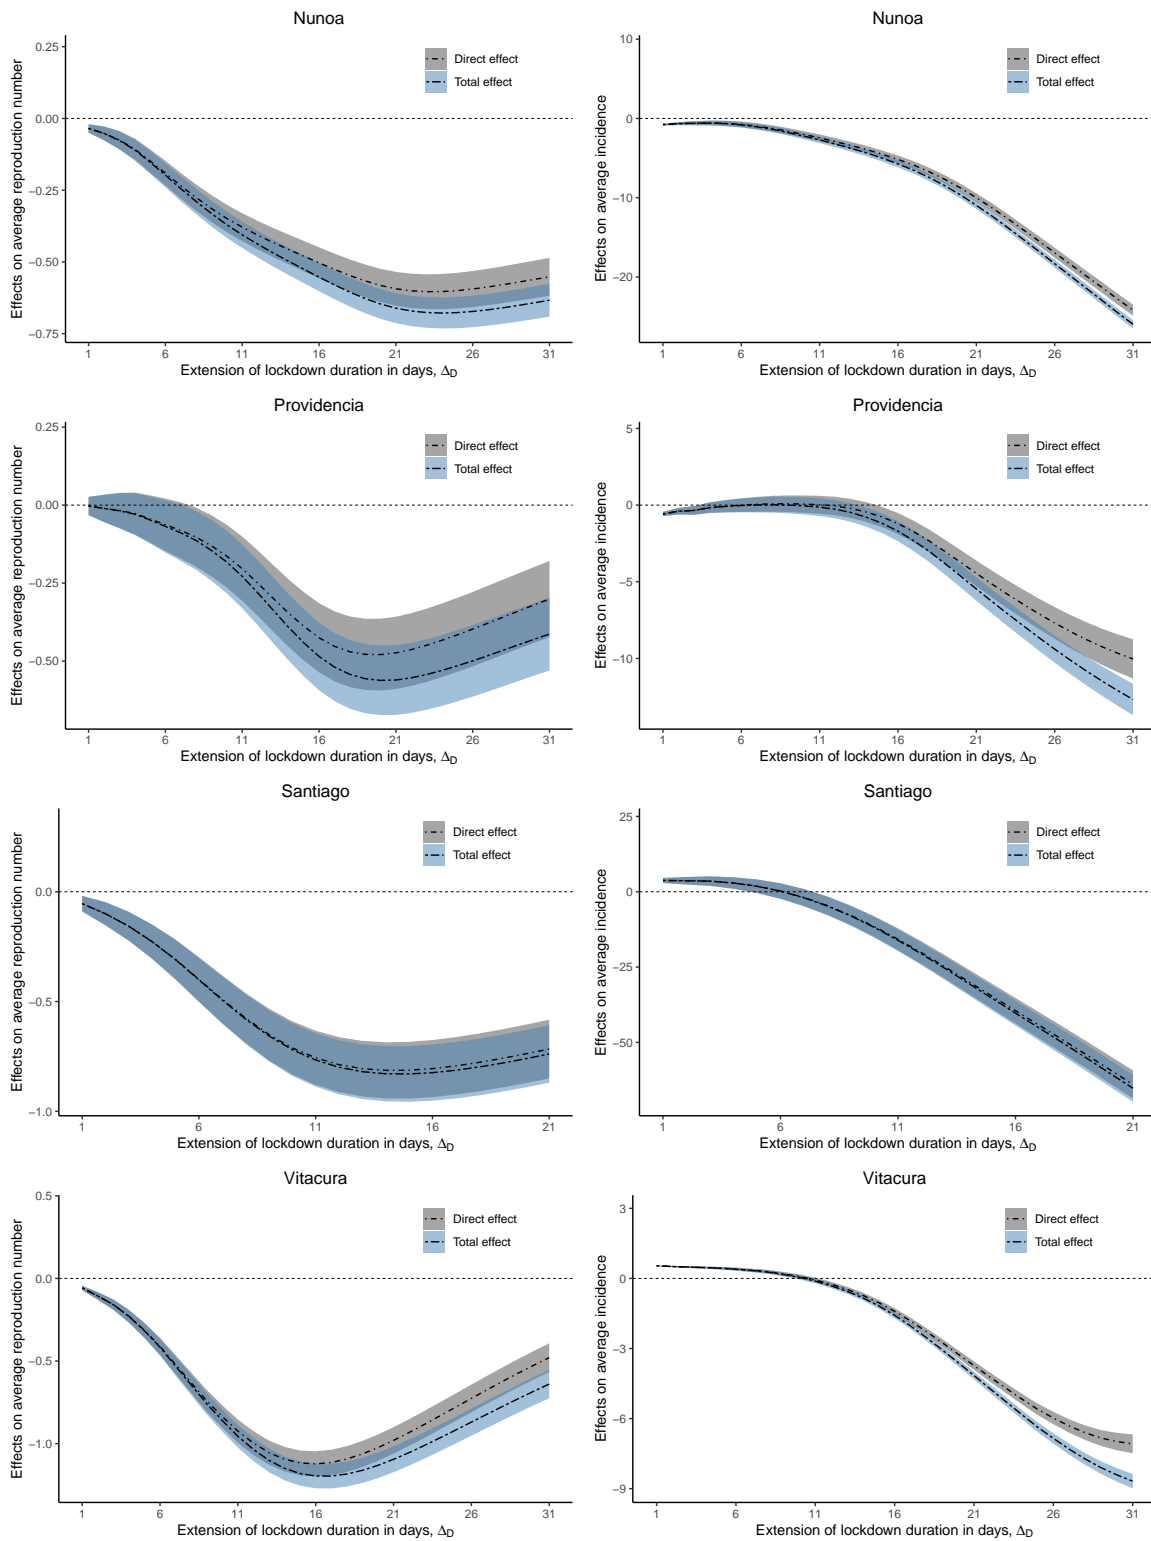

**Supplementary Figure 8:** Direct and total effects of extended lockdowns in Ñuñoa, Providencia, Santiago, and Vitacura.

## 4 Supplementary Tables

### 4.1 An example

**Supplementary Table 1:** Example alternative lockdown interventions at the level of the municipality and its neighbours over a time horizon of 4 weeks.

| Intervention                          | Time              |                    |                     |                     |
|---------------------------------------|-------------------|--------------------|---------------------|---------------------|
|                                       | $t = 1, \dots, 7$ | $t = 8, \dots, 14$ | $t = 15, \dots, 21$ | $t = 22, \dots, 28$ |
| On municipality $i$                   |                   |                    |                     |                     |
| $\underline{l}_{it}^a$                | 0                 | 1                  | 1                   | 0                   |
| $\underline{l}_{it}^b$                | 0                 | 1                  | 1                   | 1                   |
| On the neighbours of municipality $i$ |                   |                    |                     |                     |
| $\underline{p}_{(i)t}^c$              | 0                 | 0.5                | 0.5                 | 0.25                |
| $\underline{p}_{(i)t}^d$              | 0                 | 0.5                | 0.5                 | 0.5                 |

## 4.2 Baseline covariates

**Supplementary Table 2:** Summary of baseline covariates in 324 municipalities with no missing values.

| Variable        | Mean (SD)             | IQR (25%, 75%)       | Description                                                                                                                                                                                                                             |
|-----------------|-----------------------|----------------------|-----------------------------------------------------------------------------------------------------------------------------------------------------------------------------------------------------------------------------------------|
| Rural           | 0.37 (0.28)           | 0.09, 0.59           | Proportion of the population in rural areas.                                                                                                                                                                                            |
| Female          | 0.52 (0.03)           | 0.50, 0.53           | Proportion of female population.                                                                                                                                                                                                        |
| Over 65         | 0.13 (0.03)           | 0.11, 0.15           | Proportion of the population over 65.                                                                                                                                                                                                   |
| Poverty         | 0.13 (0.08)           | 0.07, 0.17           | Proportion of the population living with a monthly income per capita below the poverty line (about 3.9 USD per person per day in 2017).                                                                                                 |
| Overcrowding    | 0.09 (0.05)           | 0.06, 0.12           | Proportion of households with an overcrowding condition (people/rooms $\geq$ 2.5).                                                                                                                                                      |
| Poor sanitation | 0.14 (0.15)           | 0.04, 0.20           | Proportion of the population with inadequate sanitation (House Sanitation Index). Inadequate sanitation defined as a household with no access to drinkable water, or without a toilet or latrine connected to the sewer or septic tank. |
| Income          | 285691.44 (152089.93) | 212992.25, 305508.25 | Average income per capita in 2017 CLP (Chilean pesos; 1 USD = 700 CLP).                                                                                                                                                                 |
| Area            | 1966.99 (4758.30)     | 243.75, 1455.95      | Area in km <sup>2</sup> . Area is divided into small/medium/large area in the balancing procedure.                                                                                                                                      |

### 4.3 Covariate balance

**Supplementary Table 3: Balance in baseline covariates and lagged variables.** Balance in the municipality of Lo Barnechea and its control set at the start of the intervention  $\tilde{t} + 1$ , before and after weighting. See also Supplementary Figure 2 for a summary distribution of imbalances in all the lagged variables.

| Baseline covariates | Lo Barnechea | Control Set | Synthetic Lo Barnechea |
|---------------------|--------------|-------------|------------------------|
| Rural               | 0.00         | 0.03        | 0.00                   |
| Female              | 0.56         | 0.52        | 0.56                   |
| Over 65             | 0.08         | 0.11        | 0.08                   |
| Poverty             | 0.03         | 0.07        | 0.03                   |
| Overcrowding        | 0.12         | 0.12        | 0.12                   |
| Poor sanitation     | 0.05         | 0.04        | 0.05                   |
| Income              | 714251.33    | 378907.93   | 714251.33              |
| Area (small)        | 0.00         | 0.35        | 0.00                   |
| Area (medium)       | 1.00         | 0.36        | 1.00                   |
| Area (large)        | 0.00         | 0.29        | 0.00                   |
| Lagged variables    | Lo Barnechea | Control Set | Synthetic Lo Barnechea |
| $R_{t-7}$           | 1.43         | 1.14        | 1.43                   |
| $R_{t-6}$           | 1.41         | 1.13        | 1.41                   |
| $R_{t-5}$           | 1.38         | 1.12        | 1.38                   |
| $R_{t-4}$           | 1.33         | 1.10        | 1.33                   |
| $R_{t-3}$           | 1.29         | 1.10        | 1.29                   |
| $R_{t-2}$           | 1.27         | 1.09        | 1.27                   |
| $R_{t-1}$           | 1.28         | 1.08        | 1.28                   |
| $L_{t-7}$           | 1.00         | 0.95        | 1.03                   |
| $L_{t-6}$           | 1.00         | 0.95        | 1.03                   |
| $L_{t-5}$           | 1.00         | 0.95        | 1.01                   |
| $L_{t-4}$           | 1.00         | 0.95        | 1.00                   |
| $L_{t-3}$           | 1.00         | 0.96        | 0.99                   |
| $L_{t-2}$           | 1.00         | 0.96        | 0.97                   |
| $L_{t-1}$           | 1.00         | 0.96        | 0.96                   |
| $P_{t-7}$           | 0.53         | 0.73        | 0.52                   |
| $P_{t-6}$           | 0.53         | 0.74        | 0.53                   |
| $P_{t-5}$           | 0.53         | 0.75        | 0.53                   |
| $P_{t-4}$           | 0.53         | 0.75        | 0.54                   |
| $P_{t-3}$           | 0.53         | 0.76        | 0.54                   |
| $P_{t-2}$           | 0.53         | 0.77        | 0.52                   |
| $P_{t-1}$           | 0.53         | 0.78        | 0.54                   |

**Supplementary Table 4: Balance in baseline covariates and lagged variables.** Balance in the municipality of Providencia and its control set at the start of the intervention  $\tilde{t} + 1$ , before and after weighting. See also Supplementary Figure 2 for a summary distribution of imbalances in all the lagged variables.

| Baseline covariates | Providencia | Control Set | Synthetic Providencia |
|---------------------|-------------|-------------|-----------------------|
| Rural               | 0.00        | 0.03        | 0.00                  |
| Female              | 0.53        | 0.52        | 0.53                  |
| Over 65             | 0.16        | 0.11        | 0.16                  |
| Poverty             | 0.00        | 0.07        | 0.00                  |
| Overcrowding        | 0.01        | 0.12        | 0.01                  |
| Poor sanitation     | 0.01        | 0.04        | 0.01                  |
| Income              | 1360119.37  | 375505.64   | 1360119.37            |
| Area (small)        | 1.00        | 0.35        | 1.00                  |
| Area (medium)       | 0.00        | 0.36        | 0.00                  |
| Area (large)        | 0.00        | 0.29        | 0.00                  |
| Lagged variables    | Providencia | Control Set | Synthetic Providencia |
| $R_{t-7}$           | 1.41        | 1.14        | 1.41                  |
| $R_{t-6}$           | 1.42        | 1.13        | 1.42                  |
| $R_{t-5}$           | 1.41        | 1.11        | 1.41                  |
| $R_{t-4}$           | 1.36        | 1.10        | 1.36                  |
| $R_{t-3}$           | 1.31        | 1.09        | 1.31                  |
| $R_{t-2}$           | 1.24        | 1.09        | 1.24                  |
| $R_{t-1}$           | 1.17        | 1.08        | 1.17                  |
| $L_{t-7}$           | 1.00        | 0.95        | 1.03                  |
| $L_{t-6}$           | 1.00        | 0.95        | 1.02                  |
| $L_{t-5}$           | 1.00        | 0.95        | 1.01                  |
| $L_{t-4}$           | 1.00        | 0.95        | 1.00                  |
| $L_{t-3}$           | 1.00        | 0.96        | 0.99                  |
| $L_{t-2}$           | 1.00        | 0.96        | 0.98                  |
| $L_{t-1}$           | 1.00        | 0.96        | 0.96                  |
| $P_{t-7}$           | 0.80        | 0.73        | 0.82                  |
| $P_{t-6}$           | 0.80        | 0.74        | 0.81                  |
| $P_{t-5}$           | 0.80        | 0.74        | 0.81                  |
| $P_{t-4}$           | 0.80        | 0.75        | 0.81                  |
| $P_{t-3}$           | 0.80        | 0.76        | 0.80                  |
| $P_{t-2}$           | 0.80        | 0.77        | 0.79                  |
| $P_{t-1}$           | 0.80        | 0.78        | 0.78                  |



**Supplementary Table 5: Balance in baseline covariates and lagged variables.** Balance in the municipality of Santiago and its control set at the start of the intervention  $\tilde{t} + 1$ , before and after weighting. See also Supplementary Figure 2 for a summary distribution of imbalances in all the lagged variables.

| Baseline covariates | Santiago  | Control Set | Synthetic Santiago |
|---------------------|-----------|-------------|--------------------|
| Rural               | 0.00      | 0.03        | 0.00               |
| Female              | 0.50      | 0.52        | 0.50               |
| Over 65             | 0.07      | 0.11        | 0.07               |
| Poverty             | 0.04      | 0.07        | 0.04               |
| Overcrowding        | 0.19      | 0.12        | 0.19               |
| Poor sanitation     | 0.02      | 0.04        | 0.02               |
| Income              | 593633.86 | 375521.94   | 593633.86          |
| Area (small)        | 1.00      | 0.36        | 1.00               |
| Area (medium)       | 0.00      | 0.35        | 0.00               |
| Area (large)        | 0.00      | 0.30        | 0.00               |
| Lagged variables    | Santiago  | Control Set | Synthetic Santiago |
| $R_{t-7}$           | 1.14      | 1.13        | 1.14               |
| $R_{t-6}$           | 1.14      | 1.12        | 1.14               |
| $R_{t-5}$           | 1.14      | 1.10        | 1.14               |
| $R_{t-4}$           | 1.17      | 1.09        | 1.17               |
| $R_{t-3}$           | 1.19      | 1.08        | 1.19               |
| $R_{t-2}$           | 1.24      | 1.07        | 1.24               |
| $R_{t-1}$           | 1.31      | 1.07        | 1.31               |
| $L_{t-7}$           | 1.00      | 0.95        | 1.01               |
| $L_{t-6}$           | 1.00      | 0.95        | 1.01               |
| $L_{t-5}$           | 1.00      | 0.96        | 1.00               |
| $L_{t-4}$           | 1.00      | 0.96        | 1.00               |
| $L_{t-3}$           | 1.00      | 0.96        | 1.00               |
| $L_{t-2}$           | 1.00      | 0.96        | 0.99               |
| $L_{t-1}$           | 1.00      | 0.96        | 0.99               |
| $P_{t-7}$           | 0.36      | 0.74        | 0.35               |
| $P_{t-6}$           | 0.36      | 0.75        | 0.33               |
| $P_{t-5}$           | 0.36      | 0.76        | 0.34               |
| $P_{t-4}$           | 0.36      | 0.76        | 0.36               |
| $P_{t-3}$           | 0.36      | 0.77        | 0.38               |
| $P_{t-2}$           | 0.36      | 0.78        | 0.36               |
| $P_{t-1}$           | 0.36      | 0.79        | 0.39               |

**Supplementary Table 6: Balance in baseline covariates and lagged variables.** Balance in the municipality of Punta Arenas and its control set at the start of intervention, before and after weighting. See also Supplementary Figure 5B for a summary distribution of imbalances in all the lagged variables.

| Baseline covariates | Punta Arenas | Control Set | Synthetic Punta Arenas |
|---------------------|--------------|-------------|------------------------|
| Rural               | 0.06         | 0.14        | 0.06                   |
| Female              | 0.52         | 0.53        | 0.52                   |
| Over 65             | 0.12         | 0.12        | 0.12                   |
| Poverty             | 0.02         | 0.11        | 0.02                   |
| Overcrowding        | 0.07         | 0.09        | 0.07                   |
| Poor sanitation     | 0.06         | 0.09        | 0.06                   |
| Income              | 492972.66    | 474566.28   | 492972.66              |
| Area (small)        | 0.00         | 0.36        | 0.00                   |
| Area (medium)       | 0.00         | 0.38        | 0.00                   |
| Area (large)        | 1.00         | 0.26        | 1.00                   |
| Lagged variables    | Punta Arenas | Control Set | Synthetic Punta Arenas |
| $R_{t-7}$           | 0.73         | 1.54        | 0.73                   |
| $R_{t-6}$           | 0.75         | 1.56        | 0.75                   |
| $R_{t-5}$           | 0.77         | 1.58        | 0.77                   |
| $R_{t-4}$           | 0.80         | 1.60        | 0.80                   |
| $R_{t-3}$           | 0.84         | 1.61        | 0.84                   |
| $R_{t-2}$           | 0.88         | 1.62        | 0.88                   |
| $R_{t-1}$           | 0.92         | 1.63        | 0.92                   |
| $L_{t-7}$           | 1.00         | 0.24        | 1.28                   |
| $L_{t-6}$           | 1.00         | 0.21        | 1.27                   |
| $L_{t-5}$           | 1.00         | 0.18        | 1.21                   |
| $L_{t-4}$           | 1.00         | 0.15        | 1.10                   |
| $L_{t-3}$           | 1.00         | 0.12        | 0.94                   |
| $L_{t-2}$           | 1.00         | 0.09        | 0.73                   |
| $L_{t-1}$           | 1.00         | 0.06        | 0.48                   |
| $P_{t-7}$           | 0.00         | 0.14        | 0.06                   |
| $P_{t-6}$           | 0.00         | 0.13        | 0.04                   |
| $P_{t-5}$           | 0.00         | 0.12        | 0.02                   |
| $P_{t-4}$           | 0.00         | 0.11        | 0.00                   |
| $P_{t-3}$           | 0.00         | 0.10        | -0.02                  |
| $P_{t-2}$           | 0.00         | 0.09        | -0.04                  |
| $P_{t-1}$           | 0.00         | 0.08        | -0.06                  |

## 4.4 Estimates

**Supplementary Table 7: Numeric results in Figure 2D and Supplementary Figure 3.** Observed and estimated effective reproduction numbers when the duration of the lockdown in a given municipality is extended from date  $\tilde{t}$  to  $\tilde{t} + \Delta_D$ , and when in addition to extending the duration of the lockdown, the proportion of the population under lockdown in the neighbouring municipalities at date  $\tilde{t}$  is maintained constant until  $\tilde{t} + \Delta_D$ .

|               | $\Delta_D$ | $P_{[\tilde{t}+1, \tilde{t}+\Delta_D]}$ | $R_{\tilde{t}+7}^*$ | $R_{\tilde{t}+14}^*$ | $R_{\tilde{t}+21}^*$ |
|---------------|------------|-----------------------------------------|---------------------|----------------------|----------------------|
| Independencia | 0          | $p^{\text{obs}}$                        | 2.45                | 2.13                 | 2.14                 |
| Independencia | 21         | $p^{\text{obs}}$                        | 1.27 [1.05, 1.48]   | 1.16 [0.89, 1.43]    | 1.44 [1.15, 1.72]    |
| Independencia | 21         | 54.0%                                   | 1.26 [1.05, 1.47]   | 1.12 [0.86, 1.39]    | 1.35 [1.08, 1.63]    |
| Las Condes    | 0          | $p^{\text{obs}}$                        | 2.79                | 2.21                 | 1.53                 |
| Las Condes    | 21         | $p^{\text{obs}}$                        | 2.09 [1.97, 2.22]   | 1.45 [1.07, 1.84]    | 1.38 [0.92, 1.84]    |
| Las Condes    | 21         | 49.5% <sup>4</sup>                      | 1.46 [1.36, 1.55]   | 1.25 [1.14, 1.35]    | 1.36 [1.26, 1.47]    |
| Lo Barnechea  | 0          | $p^{\text{obs}}$                        | 1.83                | 2.17                 | 1.62                 |
| Lo Barnechea  | 21         | $p^{\text{obs}}$                        | 1.26 [1.23, 1.29]   | 1.24 [1.20, 1.28]    | 1.32 [1.27, 1.36]    |
| Lo Barnechea  | 21         | 53.0%                                   | 1.24 [1.21, 1.27]   | 1.12 [1.09, 1.16]    | 1.10 [1.06, 1.14]    |
| Ñuñoa         | 0          | $p^{\text{obs}}$                        | 1.54                | 1.90                 | 1.98                 |
| Ñuñoa         | 21         | $p^{\text{obs}}$                        | 1.04 [1.00, 1.07]   | 1.14 [1.09, 1.18]    | 1.16 [1.11, 1.21]    |
| Ñuñoa         | 21         | 56.5%                                   | 1.01 [0.98, 1.04]   | 1.03 [0.99, 1.07]    | 1.03 [0.99, 1.08]    |
| Providencia   | 0          | $p^{\text{obs}}$                        | 1.39                | 2.47                 | 1.85                 |
| Providencia   | 21         | $p^{\text{obs}}$                        | 1.20 [1.14, 1.26]   | 1.51 [1.43, 1.58]    | 1.48 [1.40, 1.56]    |
| Providencia   | 21         | 80.3%                                   | 1.18 [1.11, 1.24]   | 1.37 [1.30, 1.43]    | 1.31 [1.24, 1.38]    |
| Santiago      | 0          | $p^{\text{obs}}$                        | 2.34                | 2.03                 | 1.46                 |
| Santiago      | 21         | $p^{\text{obs}}$                        | 1.30 [1.23, 1.38]   | 1.12 [1.03, 1.20]    | 1.18 [1.09, 1.27]    |
| Santiago      | 21         | 35.8%                                   | 1.29 [1.22, 1.37]   | 1.08 [0.99, 1.16]    | 1.16 [1.07, 1.24]    |
| Vitacura      | 0          | $p^{\text{obs}}$                        | 2.76                | 3.33                 | 2.01                 |
| Vitacura      | 21         | $p^{\text{obs}}$                        | 1.57 [1.51, 1.62]   | 1.72 [1.66, 1.78]    | 1.91 [1.85, 1.98]    |
| Vitacura      | 21         | 66.9%                                   | 1.54 [1.49, 1.59]   | 1.55 [1.49, 1.61]    | 1.65 [1.58, 1.71]    |

<sup>4</sup>To be consistent with the rest of the municipalities in the group,  $p$  is the value of  $P_t$  on the last day before reopening in Lo Barnechea, Vitacura, Providencia, Santiago, and Ñuñoa.

**Supplementary Table 8: Numeric results in Figure 2E and Supplementary Figure 3.** Observed and estimated incidences when the duration of the lockdown in a given municipality is extended from date  $\tilde{t}$  to  $\tilde{t} + \Delta_D$ , and when in addition to extending the duration of the lockdown, the proportion of the population under lockdown in the neighbouring municipalities at date  $\tilde{t}$  is maintained constant until  $\tilde{t} + \Delta_D$ .

|               | $\Delta_D$ | $P_{[\tilde{t}+1, \tilde{t}+\Delta_D]}$ | $I_{\tilde{t}+7}^{(*)}$ | $I_{\tilde{t}+14}^{(*)}$ | $I_{\tilde{t}+21}^{(*)}$ |
|---------------|------------|-----------------------------------------|-------------------------|--------------------------|--------------------------|
| Independencia | 0          | $p^{\text{obs}}$                        | 10.93                   | 25.70                    | 58.10                    |
| Independencia | 21         | $p^{\text{obs}}$                        | 5.66 [4.71, 6.62]       | 6.39 [4.88, 7.89]        | 9.39 [7.53, 11.25]       |
| Independencia | 21         | 54.0%                                   | 5.63 [4.68, 6.58]       | 6.13 [4.68, 7.57]        | 8.46 [6.74, 10.19]       |
| Las Condes    | 0          | $p^{\text{obs}}$                        | 17.08                   | 47.49                    | 77.65                    |
| Las Condes    | 21         | $p^{\text{obs}}$                        | 16.35 [15.37, 17.32]    | 22.53 [16.52, 28.55]     | 30.10 [20.08, 40.12]     |
| Las Condes    | 21         | 49.5%                                   | 9.49 [8.78, 10.20]      | 12.01 [11.04, 12.98]     | 16.87 [15.60, 18.14]     |
| Lo Barnechea  | 0          | $p^{\text{obs}}$                        | 8.91                    | 20.49                    | 35.86                    |
| Lo Barnechea  | 21         | $p^{\text{obs}}$                        | 7.62 [7.43, 7.81]       | 9.41 [9.1, 9.71]         | 12.40 [11.95, 12.84]     |
| Lo Barnechea  | 21         | 53.0%                                   | 7.54 [7.36, 7.72]       | 8.35 [8.08, 8.62]        | 9.12 [8.78, 9.45]        |
| Ñuñoa         | 0          | $p^{\text{obs}}$                        | 11.43                   | 21.13                    | 46.42                    |
| Ñuñoa         | 21         | $p^{\text{obs}}$                        | 9.10 [8.81, 9.39]       | 10.47 [10.06, 10.88]     | 12.10 [11.57, 12.64]     |
| Ñuñoa         | 21         | 56.5%                                   | 8.84 [8.57, 9.11]       | 9.21 [8.87, 9.55]        | 9.52 [9.12, 9.92]        |
| Providencia   | 0          | $p^{\text{obs}}$                        | 6.40                    | 13.91                    | 33.95                    |
| Providencia   | 21         | $p^{\text{obs}}$                        | 6.75 [6.39, 7.11]       | 10.32 [9.83, 10.82]      | 15.05 [14.27, 15.82]     |
| Providencia   | 21         | 80.3%                                   | 6.62 [6.26, 6.98]       | 9.10 [8.64, 9.57]        | 11.71 [11.07, 12.36]     |
| Santiago      | 0          | $p^{\text{obs}}$                        | 52.37                   | 133.64                   | 211.34                   |
| Santiago      | 21         | $p^{\text{obs}}$                        | 37.50 [35.27, 39.73]    | 40.65 [37.51, 43.79]     | 48.47 [44.84, 52.11]     |
| Santiago      | 21         | 35.8%                                   | 37.17 [34.97, 39.36]    | 38.83 [35.79, 41.87]     | 45.38 [41.97, 48.80]     |
| Vitacura      | 0          | $p^{\text{obs}}$                        | 1.98                    | 7.56                     | 20.20                    |
| Vitacura      | 21         | $p^{\text{obs}}$                        | 2.02 [1.95, 2.09]       | 3.47 [3.35, 3.60]        | 6.70 [6.47, 6.93]        |
| Vitacura      | 21         | 66.9%                                   | 1.98 [1.91, 2.05]       | 3.04 [2.93, 3.16]        | 5.01 [4.81, 5.20]        |

**Supplementary Table 9: Numeric results in Supplementary Figure 7 and Supplementary Figure 8.** Observed and estimated average effective reproduction number and cumulative incidences when the duration of the lockdown in a given municipality is extended from date  $\tilde{t}$  to  $\tilde{t} + \Delta_D$ , and when in addition to extending the duration of the lockdown, the proportion of the population under lockdown in the neighbouring municipalities at date  $\tilde{t}$  is maintained constant until  $\tilde{t} + \Delta_D$ .

|               | $\Delta_D$ | $P_{[\tilde{t}+1, \tilde{t}+\Delta_D]}$ | $\text{avg}(R_{[\tilde{t}+1, \tilde{t}+21]}(*))$ | $\text{cum}(I_{[\tilde{t}+1, \tilde{t}+21]}(*))$ | $\text{cum}(I_{[\tilde{t}+1, \tilde{t}+21]}(*))$ |
|---------------|------------|-----------------------------------------|--------------------------------------------------|--------------------------------------------------|--------------------------------------------------|
| Independencia | 0          | $p^{\text{obs}}$                        | 2.27                                             | 471                                              | 331                                              |
| Independencia | 21         | $p^{\text{obs}}$                        | 1.37 [1.18, 1.55]                                | 136 [114, 158]                                   | 96 [81, 111]                                     |
| Independencia | 21         | 54.0%                                   | 1.34 [1.16, 1.52]                                | 131 [110, 152]                                   | 92 [78, 107]                                     |
| Las Condes    | 0          | $p^{\text{obs}}$                        | 2.26                                             | 763                                              | 231                                              |
| Las Condes    | 21         | $p^{\text{obs}}$                        | 1.71 [1.15, 2.27]                                | 410 [196, 624]                                   | 124 [59, 189]                                    |
| Las Condes    | 21         | 49.5%                                   | 1.44 [1.26, 1.63]                                | 308 [275, 342]                                   | 93 [83, 103]                                     |
| Lo Barnechea  | 0          | $p^{\text{obs}}$                        | 1.83                                             | 364                                              | 293                                              |
| Lo Barnechea  | 21         | $p^{\text{obs}}$                        | 1.27 [1.21, 1.34]                                | 187 [176, 197]                                   | 151 [142, 159]                                   |
| Lo Barnechea  | 21         | 53.0%                                   | 1.19 [1.13, 1.25]                                | 167 [158, 176]                                   | 135 [127, 142]                                   |
| Ñuñoa         | 0          | $p^{\text{obs}}$                        | 1.71                                             | 422                                              | 168                                              |
| Ñuñoa         | 21         | $p^{\text{obs}}$                        | 1.11 [1.05, 1.17]                                | 212 [200, 223]                                   | 85 [80, 89]                                      |
| Ñuñoa         | 21         | 56.5%                                   | 1.04 [0.99, 1.10]                                | 191 [182, 201]                                   | 77 [73, 80]                                      |
| Providencia   | 0          | $p^{\text{obs}}$                        | 1.82                                             | 286                                              | 181                                              |
| Providencia   | 21         | $p^{\text{obs}}$                        | 1.34 [1.23, 1.46]                                | 193 [175, 210]                                   | 122 [111, 133]                                   |
| Providencia   | 21         | 80.3%                                   | 1.25 [1.14, 1.37]                                | 171 [155, 187]                                   | 109 [98, 119]                                    |
| Santiago      | 0          | $p^{\text{obs}}$                        | 1.95                                             | 2178                                             | 433                                              |
| Santiago      | 21         | $p^{\text{obs}}$                        | 1.23 [1.10, 1.37]                                | 835 [738, 933]                                   | 166 [147, 185]                                   |
| Santiago      | 21         | 35.8%                                   | 1.21 [1.08, 1.34]                                | 808 [714, 903]                                   | 161 [142, 179]                                   |
| Vitacura      | 0          | $p^{\text{obs}}$                        | 2.61                                             | 145                                              | 150                                              |
| Vitacura      | 21         | $p^{\text{obs}}$                        | 1.63 [1.55, 1.71]                                | 67 [63, 71]                                      | 69 [65, 73]                                      |
| Vitacura      | 21         | 66.9%                                   | 1.51 [1.43, 1.59]                                | 58 [55, 62]                                      | 60 [57, 64]                                      |

**Supplementary Table 10: Numeric results in Supplementary Figure 5C.** Observed and estimated effective reproduction number and incidences when the duration of the lockdown in a given municipality is reduced from date  $\tilde{t}$  to  $\tilde{t} + \Delta_D$ , and when in addition to reducing the duration of the lockdown, the proportion of the population under lockdown in the neighbouring municipalities at date  $\tilde{t}$  is maintained constant until  $\tilde{t} + 7$ .

|              | $\Delta_D$ | $P_{(\tilde{t}+\Delta_D, \tilde{t}+7]}$ | $R_{\tilde{t}-7}(* )$ | $R_{\tilde{t}}(* )$  | $R_{\tilde{t}+7}(* )$ |
|--------------|------------|-----------------------------------------|-----------------------|----------------------|-----------------------|
| Punta Arenas | 0          | $p^{\text{obs}}$                        | 0.95                  | 0.72                 | 0.72                  |
| Punta Arenas | -14        | $p^{\text{obs}}$                        | 1.00 [0.88, 1.12]     | 0.93 [0.76, 1.09]    | 0.80 [0.60, 1.00]     |
| Punta Arenas | -14        | 0.0%                                    | 1.00 [0.88, 1.12]     | 0.93 [0.76, 1.09]    | 0.80 [0.60, 1.00]     |
|              | $\Delta_D$ | $P_{(\tilde{t}+\Delta_D, \tilde{t}+7]}$ | $I_{\tilde{t}-7}(* )$ | $I_{\tilde{t}}(* )$  | $I_{\tilde{t}+7}(* )$ |
| Punta Arenas | 0          | $p^{\text{obs}}$                        | 14.91                 | 10.45                | 7.97                  |
| Punta Arenas | -14        | $p^{\text{obs}}$                        | 14.84 [13.1, 16.58]   | 13.87 [11.41, 16.32] | 11.17 [8.40, 13.93]   |
| Punta Arenas | -14        | 0.0%                                    | 14.84 [13.1, 16.58]   | 13.87 [11.41, 16.32] | 11.17 [8.40, 13.93]   |

**Supplementary Table 11: Numeric results for the municipality of Lo Barnechea in Figure 3.** A range of hypercritical values from 0 to 1 are explored for  $P_t$ , letting the length of extended lockdown  $\Delta_D$  vary from 0 to 14. The end of evaluation is 21 days after  $t$ . The average incidence  $\text{avg}(I_{(\tilde{t},t]})$  is scaled to incidence per 100,000 people in Supplementary Table 11-14.

| Lo Barnechea |                                  | $\text{avg}(R_{[\tilde{t}+1,t]}), t =$ |                  |                  | $\text{avg}(I_{[\tilde{t}+1,t]}), t =$ |                  |                  |
|--------------|----------------------------------|----------------------------------------|------------------|------------------|----------------------------------------|------------------|------------------|
| $\Delta_D$   | $P_{[\tilde{t}+1,\tilde{t}+21]}$ | $\tilde{t} + 7$                        | $\tilde{t} + 14$ | $\tilde{t} + 21$ | $\tilde{t} + 7$                        | $\tilde{t} + 14$ | $\tilde{t} + 21$ |
| 0            | 0.0%                             | 1.49                                   | 1.49             | 1.34             | 6.71                                   | 8.29             | 8.68             |
| 0            | 25.0%                            | 1.49                                   | 1.46             | 1.33             | 6.68                                   | 8.02             | 8.53             |
| 0            | 50.0%                            | 1.48                                   | 1.41             | 1.30             | 6.66                                   | 7.65             | 8.12             |
| 0            | 75.0%                            | 1.48                                   | 1.37             | 1.29             | 6.64                                   | 7.31             | 7.86             |
| 0            | 100.0%                           | 1.47                                   | 1.34             | 1.31             | 6.60                                   | 7.13             | 7.93             |
| 7            | 0.0%                             | 1.29                                   | 1.42             | 1.47             | 5.71                                   | 7.35             | 9.54             |
| 7            | 25.0%                            | 1.29                                   | 1.36             | 1.39             | 5.69                                   | 6.93             | 8.47             |
| 7            | 50.0%                            | 1.28                                   | 1.33             | 1.32             | 5.66                                   | 6.69             | 7.78             |
| 7            | 75.0%                            | 1.28                                   | 1.31             | 1.28             | 5.63                                   | 6.56             | 7.38             |
| 7            | 100.0%                           | 1.27                                   | 1.28             | 1.24             | 5.61                                   | 6.37             | 6.92             |
| 14           | 0.0%                             | 1.29                                   | 1.29             | 1.38             | 5.71                                   | 6.46             | 8.16             |
| 14           | 25.0%                            | 1.29                                   | 1.26             | 1.32             | 5.69                                   | 6.28             | 7.50             |
| 14           | 50.0%                            | 1.28                                   | 1.23             | 1.27             | 5.66                                   | 6.11             | 6.98             |
| 14           | 75.0%                            | 1.28                                   | 1.21             | 1.23             | 5.63                                   | 5.94             | 6.62             |
| 14           | 100.0%                           | 1.27                                   | 1.18             | 1.19             | 5.61                                   | 5.79             | 6.25             |

**Supplementary Table 12: Numeric results for the municipality of Providencia in Figure 3.**

A range of hypercritical values from 0 to 1 are explored for  $P_t$ , letting the length of extended lockdown  $\Delta_D$  vary from 0 to 14. The end of evaluation is 21 days after  $\tilde{t}$ .

| Providencia |                                  | avg( $R_{[\tilde{t}+1,t]}$ ), $t =$ |                  |                  | avg( $I_{[\tilde{t}+1,t]}$ ), $t =$ |                  |                  |
|-------------|----------------------------------|-------------------------------------|------------------|------------------|-------------------------------------|------------------|------------------|
| $\Delta_D$  | $P_{[\tilde{t}+1,\tilde{t}+21]}$ | $\tilde{t} + 7$                     | $\tilde{t} + 14$ | $\tilde{t} + 21$ | $\tilde{t} + 7$                     | $\tilde{t} + 14$ | $\tilde{t} + 21$ |
| 0           | 0.0%                             | 1.30                                | 1.68             | 1.85             | 4.42                                | 7.17             | 12.03            |
| 0           | 25.0%                            | 1.29                                | 1.61             | 1.79             | 4.39                                | 6.77             | 11.11            |
| 0           | 50.0%                            | 1.28                                | 1.55             | 1.75             | 4.37                                | 6.42             | 10.41            |
| 0           | 75.0%                            | 1.28                                | 1.52             | 1.74             | 4.35                                | 6.25             | 10.23            |
| 0           | 100.0%                           | 1.27                                | 1.50             | 1.73             | 4.33                                | 6.08             | 10.00            |
| 7           | 0.0%                             | 1.13                                | 1.44             | 1.73             | 3.81                                | 5.48             | 9.43             |
| 7           | 25.0%                            | 1.13                                | 1.38             | 1.63             | 3.79                                | 5.21             | 8.31             |
| 7           | 50.0%                            | 1.12                                | 1.34             | 1.54             | 3.77                                | 4.98             | 7.46             |
| 7           | 75.0%                            | 1.12                                | 1.32             | 1.50             | 3.75                                | 4.90             | 7.06             |
| 7           | 100.0%                           | 1.11                                | 1.31             | 1.47             | 3.73                                | 4.83             | 6.82             |
| 14          | 0.0%                             | 1.13                                | 1.30             | 1.47             | 3.81                                | 4.83             | 6.78             |
| 14          | 25.0%                            | 1.13                                | 1.27             | 1.41             | 3.79                                | 4.70             | 6.30             |
| 14          | 50.0%                            | 1.12                                | 1.25             | 1.36             | 3.77                                | 4.56             | 5.87             |
| 14          | 75.0%                            | 1.12                                | 1.22             | 1.32             | 3.75                                | 4.43             | 5.56             |
| 14          | 100.0%                           | 1.11                                | 1.19             | 1.29             | 3.73                                | 4.31             | 5.31             |



**Supplementary Table 13: Numeric results for the municipality of Santiago in Figure 3.**

A range of hypercritical values from 0 to 1 are explored for  $P_t$ , letting the length of extended lockdown  $\Delta_D$  vary from 0 to 14. The end of evaluation is 21 days after  $\tilde{t}$ .

| Santiago   |                                  | avg( $R_{[\tilde{t}+1,t]}$ ), $t =$ |                  |                  | avg( $I_{[\tilde{t}+1,t]}$ ), $t =$ |                  |                  |
|------------|----------------------------------|-------------------------------------|------------------|------------------|-------------------------------------|------------------|------------------|
| $\Delta_D$ | $P_{[\tilde{t}+1,\tilde{t}+21]}$ | $\tilde{t} + 7$                     | $\tilde{t} + 14$ | $\tilde{t} + 21$ | $\tilde{t} + 7$                     | $\tilde{t} + 14$ | $\tilde{t} + 21$ |
| 0          | 0.0%                             | 1.65                                | 2.21             | 2.53             | 8.60                                | 17.35            | 40.90            |
| 0          | 25.0%                            | 1.63                                | 2.10             | 2.43             | 8.47                                | 15.96            | 36.36            |
| 0          | 50.0%                            | 1.61                                | 2.00             | 2.35             | 8.35                                | 14.82            | 33.03            |
| 0          | 75.0%                            | 1.59                                | 1.92             | 2.28             | 8.24                                | 13.83            | 30.19            |
| 0          | 100.0%                           | 1.57                                | 1.86             | 2.25             | 8.16                                | 13.11            | 28.78            |
| 7          | 0.0%                             | 1.38                                | 1.52             | 1.98             | 7.00                                | 9.36             | 18.88            |
| 7          | 25.0%                            | 1.37                                | 1.45             | 1.85             | 6.98                                | 8.80             | 16.27            |
| 7          | 50.0%                            | 1.37                                | 1.39             | 1.74             | 6.96                                | 8.27             | 14.08            |
| 7          | 75.0%                            | 1.37                                | 1.33             | 1.64             | 6.94                                | 7.82             | 12.39            |
| 7          | 100.0%                           | 1.36                                | 1.29             | 1.56             | 6.92                                | 7.48             | 11.13            |
| 14         | 0.0%                             | 1.38                                | 1.28             | 1.41             | 7.00                                | 7.44             | 9.54             |
| 14         | 25.0%                            | 1.37                                | 1.26             | 1.35             | 6.98                                | 7.30             | 8.88             |
| 14         | 50.0%                            | 1.37                                | 1.24             | 1.29             | 6.96                                | 7.16             | 8.30             |
| 14         | 75.0%                            | 1.37                                | 1.22             | 1.25             | 6.94                                | 7.03             | 7.79             |
| 14         | 100.0%                           | 1.36                                | 1.21             | 1.21             | 6.92                                | 6.89             | 7.39             |

**Supplementary Table 14: Numeric results for the municipality of Punta Arenas in Supplementary Figure 5D.** A range of hypercritical values from 0 to 1 are explored for  $P_t$ , letting the length of extended lockdown  $\Delta_D$  vary from -14 to 0. The end of evaluation is 21 days after  $\tilde{t} - 14$ .

| Punta Arenas |                                         | avg( $R_{(\tilde{t}-14, \tilde{t}]}$ ), $t =$ |             |                 | avg( $I_{(\tilde{t}-14, \tilde{t}]}$ ), $t =$ |             |                 |
|--------------|-----------------------------------------|-----------------------------------------------|-------------|-----------------|-----------------------------------------------|-------------|-----------------|
| $\Delta_D$   | $P_{(\tilde{t}+\Delta_D, \tilde{t}+7]}$ | $\tilde{t} - 7$                               | $\tilde{t}$ | $\tilde{t} + 7$ | $\tilde{t} - 7$                               | $\tilde{t}$ | $\tilde{t} + 7$ |
| -14          | 0.0%                                    | 1.01                                          | 1.00        | 0.95            | 10.74                                         | 10.56       | 9.95            |
| -14          | 25.0%                                   | 0.99                                          | 0.96        | 0.95            | 10.59                                         | 10.05       | 9.75            |
| -14          | 50.0%                                   | 0.98                                          | 0.92        | 0.94            | 10.48                                         | 9.62        | 9.36            |
| -14          | 75.0%                                   | 0.98                                          | 0.87        | 0.91            | 10.39                                         | 9.06        | 8.72            |
| -14          | 100.0%                                  | 0.97                                          | 0.84        | 0.93            | 10.38                                         | 8.70        | 8.58            |
| -7           | 0.0%                                    | 1.00                                          | 0.95        | 0.96            | 10.67                                         | 10.00       | 9.78            |
| -7           | 25.0%                                   | 1.00                                          | 0.94        | 0.92            | 10.67                                         | 9.88        | 9.30            |
| -7           | 50.0%                                   | 1.00                                          | 0.93        | 0.90            | 10.67                                         | 9.82        | 9.04            |
| -7           | 75.0%                                   | 1.00                                          | 0.93        | 0.87            | 10.67                                         | 9.80        | 8.76            |
| -7           | 100.0%                                  | 1.00                                          | 0.93        | 0.85            | 10.67                                         | 9.76        | 8.50            |
| 0            | 0.0%                                    | 1.00                                          | 0.90        | 0.90            | 10.67                                         | 9.44        | 8.80            |
| 0            | 25.0%                                   | 1.00                                          | 0.90        | 0.89            | 10.67                                         | 9.44        | 8.76            |
| 0            | 50.0%                                   | 1.00                                          | 0.90        | 0.89            | 10.67                                         | 9.44        | 8.74            |
| 0            | 75.0%                                   | 1.00                                          | 0.90        | 0.89            | 10.67                                         | 9.44        | 8.72            |
| 0            | 100.0%                                  | 1.00                                          | 0.90        | 0.88            | 10.67                                         | 9.44        | 8.71            |
